# Supplementary material
Source: Springer Nature journal article supplement (http://springerprofessional.de/resource/supplementary/40702_2024_1052_MOESM1_ESM.pdf/26806328)
Supplement: MOESM1 [file 26806328]

## Interviewleitfaden

Im folgenden Interview werden wir Ihnen ein paar Fragen zu den vorher geschickten Anwendungsbeispielen stellen. Gehen Sie dabei auch auf jedes Detail ein, was Ihnen dazu einfällt. Es ist kein Problem, wenn sich etwas doppelt und es gibt auch kein richtig oder falsch. Am Ende wollen wir wissen, inwieweit und in welchen Bereichen Ihnen ChatGPT in Ihrem Alltag unterstützen kann. Können wir starten oder gibt es dazu Fragen?

1. **Zu Anfang würde ich Sie bitten sich einmal kurz vorzustellen**
  - a. Alter
  - b. Schulform
  - c. Position
  - d. Aufgaben an der Schule
  - e. Fächer
  - f. Berufserfahrung
  
2. **Ist Ihnen ChatGPT bekannt bzw. wissen Sie was ChatGPT ist?**
  - a. Wenn nein, ChatGPT ist ein Chatbot, der künstlichen Intelligenz einsetzt, um mit NutzerInnen über textbasierte Nachrichten zu kommunizieren, so wie in den zuvor geschickten Anwendungsbeispielen. Chatbots sind Ihnen vielleicht schon mal auf Webseiten begegnet, wenn Sie mit einem Kundenservice Kontakt aufnehmen wollten.
  - b. Wenn ja, haben Sie ChatGPT schon einmal selbst ausprobiert oder genutzt?
  
3. **Ganz allgemein: Könnten Sie sich vorstellen, dass ChatGPT Ihren Arbeitsalltag in der Schule erleichtert, oder denken Sie, dass es Ihren Alltag eher erschwert. Wieso?**

Vielen Dank schon einmal dafür. Kommen wir nun zu den Anwendungsbeispielen, die wir Ihnen im Voraus zukommen lassen, haben. Wir gehen gemeinsam jedes Beispiel einmal durch und ich stelle Ihnen jeweils Fragen dazu, welche Sie bereits vorher von uns erhalten haben. Diese werden sich immer wieder wiederholen, beziehen sich aber auf das jeweilige Anwendungsbeispiel. Gibt es dazu irgendwelche Fragen?

### **Komplexität: Das Anwendungsbeispiel ist ... umzusetzen (umpolen)**

|  | Einfach |   |   |   |   | Kompliziert |
|--|---------|---|---|---|---|-------------|
|  | 1       | 2 | 3 | 4 | 5 | 6           |

### **Zeitaufwand: ChatGPT für dieses Anwendungsbeispiel zu nutzen ist für mich ein/eine ...**

|                                                     | Zeitaufwand |   |   |   |   | Zeitersparnis |
|-----------------------------------------------------|-------------|---|---|---|---|---------------|
|                                                     | 1           | 2 | 3 | 4 | 5 | 6             |
| Individuelle Lernentwicklung und -unterstützung     |             |   |   |   |   |               |
| Lernüberprüfungen und Leistungsbewertungen          |             |   |   |   |   |               |
| Unterrichtsvorbereitung (inhaltlich)                |             |   |   |   |   |               |
| Unterrichtskoordination                             |             |   |   |   |   |               |
| Unterrichtsdurchführung                             |             |   |   |   |   |               |
| Ansprechperson                                      |             |   |   |   |   |               |
| Nachbereitung                                       |             |   |   |   |   |               |
| Förderstatus                                        |             |   |   |   |   |               |
| Außerschulische Aktivitäten                         |             |   |   |   |   |               |
| Arbeit mit Erziehungsberechtigten                   |             |   |   |   |   |               |
| Beratung                                            |             |   |   |   |   |               |
| Inklusion & Schulentwicklung                        |             |   |   |   |   |               |
| Eigene Fort- und Weiterbildung                      |             |   |   |   |   |               |
| Konferenzen, Dienstbesprechungen und Präsentationen |             |   |   |   |   |               |
| Kommunikation und Information                       |             |   |   |   |   |               |
| Zusammenarbeit in der Schule                        |             |   |   |   |   |               |

### **Ganz allgemein: Würden Sie ChatGPT für dieses oder ein ähnliches Anwendungsbeispiel nutzen?**

|                                                     | Ja | Nein |
|-----------------------------------------------------|----|------|
| Individuelle Lernentwicklung und -unterstützung     |    |      |
| Lernüberprüfungen und Leistungsbewertungen          |    |      |
| Unterrichtsvorbereitung (inhaltlich)                |    |      |
| Unterrichtskoordination                             |    |      |
| Unterrichtsdurchführung                             |    |      |
| Ansprechperson                                      |    |      |
| Nachbereitung                                       |    |      |
| Förderstatus                                        |    |      |
| Außerschulische Aktivitäten                         |    |      |
| Arbeit mit Erziehungsberechtigten                   |    |      |
| Beratung                                            |    |      |
| Inklusion & Schulentwicklung                        |    |      |
| Eigene Fort- und Weiterbildung                      |    |      |
| Konferenzen, Dienstbesprechungen und Präsentationen |    |      |
| Kommunikation und Information                       |    |      |
| Zusammenarbeit in der Schule                        |    |      |
| Arbeits- und Gesundheitsschutz                      |    |      |

*Bevor wir das Interview beenden, noch zwei/drei kurze Fragen:*

**Welche/s Anwendungsbeispiel/e waren Ihre Tops und welches waren Ihre Flops, und wieso?**

**Welche Herausforderungen/Risiken sehen Sie in der Nutzung von ChatGPT in Ihrem Arbeitsalltag?**

**Welche Chancen sehen Sie in der Nutzung von ChatGPT in Ihrem Arbeitsalltag?**

**Möchten Sie noch etwas loswerden, wozu ich bisher keine Fragen gestellt habe? Was aber Ihrer Meinung nach wichtig ist?**
